# Supplementary material for: A Pharmacogenomic-based Antidepressant Treatment for Patients with Major Depressive Disorder: Results from an 8-week, Randomized, Single-blinded Clinical Trial
Source: PubMed Central journal article supplement — Clin Psychopharmacol Neurosci. 2018 Nov 30;16(4):469–80. doi: 10.9758/cpn.2018.16.4.469 (PMC6245286; doi:10.9758/cpn.2018.16.4.469), 2018-11-30
Supplement: cpn-16-469_suppl.pdf [file cpn-16-469_suppl.pdf]

**SUMMARY TABLE**

An initial interpretation of the results obtained from the patients genetic profile is displayed in a table below. For each drug examined, the result is indicated according to the following code:

- Standard (White box) ▶ No genetic variants relevant to the treatment have been found. Use as directed.
- Yellow box ▶ Need for drug dose monitoring and/or less likelihood of positive response.
- Green box ▶ Increased likelihood of positive response and/or lower risk of adverse drug reactions.
- Red box ▶ Increased risk of adverse drug reactions.

| Antidepressants |          |               |          |
|-----------------|----------|---------------|----------|
| Amitriptyline   | Yellow   | Bupropion     | Standard |
| Clomipramine    | Yellow   | Desipramine   | Yellow   |
| Duloxetine      | Standard | Escitalopram  | Standard |
| Fluvoxamine     | Yellow   | Imipramine    | Yellow   |
| Mirtazapine     | Green    | Nortriptyline | Yellow   |
| Sertraline      | Standard | Trimipramine  | Yellow   |
| Citalopram      | Red      |               |          |
| Doxepine        | Yellow   |               |          |
| Fluoxetine      | Yellow   |               |          |
| Mianserin       | Yellow   |               |          |
| Paroxetine      | Green    |               |          |
| Venlafaxine     | Yellow   |               |          |

  

| Antipsychotics |          |              |        |
|----------------|----------|--------------|--------|
| Aripiprazole   | Yellow   | Clozapine    | Yellow |
| Olanzapine     | Red      | Perphenazine | Yellow |
| Risperidone    | Yellow   | Thioridazine | Yellow |
| Zuclopentixol  | Yellow   |              |        |
| Haloperidol    | Yellow   |              |        |
| Quetiapine     | Standard |              |        |
| Ziprasidone    | Green    |              |        |

  

| Stabilizers and anticonvulsants |          |               |          |
|---------------------------------|----------|---------------|----------|
| Carbamazepine                   | Yellow   | Clobazam      | Standard |
| Lamotrigine                     | Standard | Levetiracetam | Standard |
| Lorazepam                       | Yellow   | Oxcarbazepine | Standard |
| Phenytoin                       | Yellow   | Pregabalin    | Standard |
| Valproic Acid                   | Standard | Vigabatrin    | Standard |
| Clonazepam                      | Standard |               |          |
| Lithium*                        | Green    |               |          |
| Phenobarbital                   | Standard |               |          |
| Topiramate                      | Standard |               |          |

  

| Others          |          |            |          |
|-----------------|----------|------------|----------|
| Atomoxetine     | Yellow   | Methadone  | Standard |
| Naloxone        | Standard | Naltrexone | Standard |
| Methylphenidate | Yellow   |            |          |
| Pramipexol      | Green    |            |          |

Supplementary Fig. 1. Neuropharmagen<sup>®</sup> (AB-Biotics, S.A., Barcelona, Spain) pharmacogenetic report (NPR) used in the study.
